# Supplementary material for: Multifunctional oxadiazole-based ultraviolet-emitting materials used as hosts for multicolor phosphorescence
Source: Royal Society of Chemistry journal article supplement (doi:10.1039/d5sc00374a), 2025-01-01
Supplement: d5sc00374a1.pdf [file d5sc00374a1.pdf]

## Supporting Information

### **Multifunctional Oxadiazole-based Ultraviolet-emitting Materials used as Host for Multicolor Phosphorescence**

Lizhi Chu, Chenglin Ma, Li Zhang, Yannan Zhou, Jingru Song, Qikun Sun, Shi-Tong Zhang\*,  
Wenjun Yang, Shanfeng Xue\*

L. Chu, C. Ma, L. Zhang, Y. Zhou, J. Song, Dr. Q. Sun, Prof. W. Yang, Prof. S. Xue  
Key Laboratory of Rubber-Plastics of Ministry of Education/Shandong Province (QUST),  
School of Polymer Science & Engineering, Qingdao University of Science & Technology, 53-  
Zhengzhou Road, Qingdao 266042, P. R. China

E-mail: [sfxue@qust.edu.cn](mailto:sfxue@qust.edu.cn)

Prof. S.-T. Zhang

State Key Laboratory of Supramolecular Structure and Materials, Institute of Theoretical  
Chemistry, College of Chemistry, Jilin University, Changchun 130012, P. R. China.

E-mail: [stzhang@jlu.edu.cn](mailto:stzhang@jlu.edu.cn)

### Contents

**SI-1 Measurements**

**SI-2 Experimental section**

**SI-3 Supporting Figures**

**SI-4 Supporting Tables**

## SI-1 Measurements

NMR spectra were recorded on a Mercury 500 spectrometer. The chemical shift for each signal was reported in ppm units. The MALDI-TOF-MS mass spectra were measured using an AXIMA-CFRTM plus instrument. The dates of thermal gravimetric analysis (TGA) are from Perkin-Elmer thermal analysis system with the temperature of 50-800°C under a heating rate of 10 °C /min and the nitrogen atmosphere. The dates of Differential scanning calorimetry (DSC) are from NETZSCH (DSC-204) instrument with the temperature of 50-350 °C at a heating rate of 20 °C /min and a nitrogen flow rate of 80 mL/min. Cyclic voltammetry (CV) analysis of the materials was recorded on a three-electrode cell with tetra-n-butylammonium hexafluorophosphate (TBAPF<sub>6</sub>, 0.1 m in acetonitrile) as the supporting electrolyte. Two platinum wires were used as counter electrode and reference electrode. The scan rate is 100 mV/s, and all the potentials were corrected to the ferrocene/ferrocene<sup>+</sup> (Fc/Fc<sup>+</sup>) standard under room temperature. The oxidation curve is obtained by dissolving the product and electrolyte in dichloromethane (DCM), and the reduction curve is obtained in N, N-Dimethylformamide (DMF). The single crystals of two molecules are obtained from the sublimation. Single-crystal X-ray diffraction data were collected by Rigaku RAXIS-PRID diffractometer. UV-vis absorption spectra were measured on a Hitachi U-4100 spectrophotometer. Fluorescence and low temperature phosphorescence measurements were measured on a Hitachi F-4600 spectrophotometer. The PLQYs were carried out using a FLS980 spectrometer. The lifetimes of films were measured on an Edinburgh FLS-980 with an EPL-375 optical laser. The DFT calculations were carried out with the Gaussian 09 B.01 Package at the level of PBE0/6-31g (d, p) and BMK/6-31g (d, p). ITO-coated glass with a sheet resistance of 15-20 Ω square<sup>-1</sup> was used as the substrate. Before device fabrication, the ITO glass substrates were cleaned with acetone, Hellmanex<sup>TM</sup> III and deionized water, dried 6h in an oven at 120 °C, the substrates were treated by O<sub>2</sub> plasma for 7 minutes to improve the hole injection ability of ITO. Finally transferred to a vacuum deposition system with a pressure of < 1.6×10<sup>-4</sup> Pa. The current–voltage–luminance characteristics were measured by using a Keithley source measurement unit (Keithley 2450 and LS-160), EL spectra were measured with Flame-S (Serial Number: FLMS16791, Range: >350 nm). EQEs were calculated from the luminance, current density, and EL spectrum, all the results were measured in the forward-viewing direction without using any light out-coupling technique. The lifetime of the device at 1000 cd m<sup>-2</sup> is deduced by Formula S1.

$$L_0^n \times LT_{50} = constant \quad \text{Formula S1}$$

EQEs were calculated from the luminance, current density, and EL spectrum, all the results were measured in the forward-viewing direction without using any light out-coupling technique. According to equation following (Formula S2).

$$EQE = \frac{\pi \cdot L \cdot e}{683 \cdot I \cdot h \cdot c} \cdot \frac{\int_{380}^{780} I(\lambda) \cdot \lambda \cdot d\lambda}{\int_{380}^{780} I(\lambda) \cdot K(\lambda) \cdot d\lambda}$$

Formula S2

where L (cd m<sup>-2</sup>) is the total luminance of the device, I (A) is the current, λ (nm) is EL wavelength, I(λ) is the relative EL intensity at each wavelength and is obtained by measuring the EL spectrum, K(λ) is the Commission International de L'Eclairage chromaticity (CIE) standard photopic efficiency function, e is the charge of an electron, h is the Planck's constant, c is the velocity of light.

The efficiency roll-offs of blue OLED device were calculated from maximum EQE and the EQE at luminescence of 1000 cd m<sup>-2</sup>. According to equation following (Formula S3):

$$\eta = \frac{EQE_{max} - EQE_{1000}}{EQE_{max}}$$

Formula S2

## SI-2 Experimental section

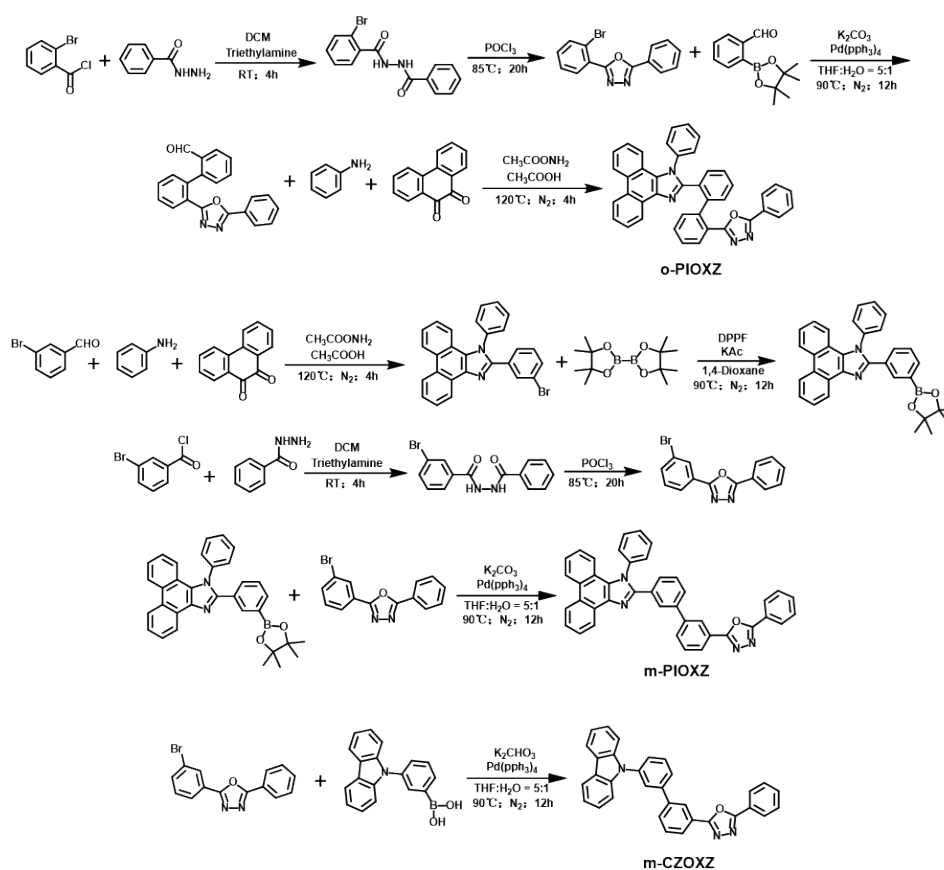

**Scheme S1.** The detailed synthesis routes of o-PIOXZ, m-PIOXZ, and m-CZOXZ.

### ***Synthesis of 2-phenyl-5-(2'-(1-phenyl-1H-phenanthro[9,10-d]imidazol-2-yl)-[1,1'-biphenyl]-2-yl)-1,3,4-oxadiazole (o-PIOXZ):***

2-Bromobenzoyl chloride (0.6 mL, 4.55 mmol) was dissolved in 50 mL dichloromethane. Then the benzoyl hydrazide (0.63 g, 4.63 mmol) was dissolved in 20 mL dichloromethane, and 2 mL triethylamine was added. Then the benzoyl hydrazide solution was slowly added dropwise to the dichloromethane system of 2-Bromobenzoyl chloride, and the reaction was carried out at room temperature for 4 h. After the reaction was completed, the mixture was removed by a rotary evaporator, purified by evaporation crystallization with anhydrous ethanol, and finally filtered and dried to obtain the qOXZ-2Br (1.28 g, yield 86%). And then qOXZ-2Br (1 g, 3.13 mmol) was added to 15 mL of POCl<sub>3</sub> solvent and the resulting solution was refluxed in a closed system in a nitrogen atmosphere at 85 °C for 20 h. After the reaction was completed, the solution was cooled to room temperature, and then the solution was added dropwise to water to quench POCl<sub>3</sub>. The mixed solvent was washed with water and dichloromethane. The organic phase was dried and filtered by MgSO<sub>4</sub>, OXZ-2Br (0.50 g, yield 53%) can be purified by column chromatography with petroleum ether/dichloromethane (1/3; v/v). And then OXZ-2Br (1 g, 3.32 mmol), 2-formylphenylboronic acid pinacol ester (0.925 g, 3.98 mmol) and K<sub>2</sub>CO<sub>3</sub> (0.69

g, 4.99 mmol) were dissolved in THF (50 mL) and water (10 mL), and Pd (PPh<sub>3</sub>)<sub>4</sub> (0.15 g, 0.13 mmol) was added at 90 °C in N<sub>2</sub> for 24 h. The excess THF was removed by a rotary evaporator after cooled down, the mixture was washed with water and dichloromethane, and then OXZ-Ph-CHO (0.52 g, yield 48%) can be purified by column chromatography with petroleum ether/dichloromethane (1/3; v/v). And then a mixture of phenanthrenequinone (1.04 g, 5.01 mmol), aniline (1.87 g, 20.04 mmol), OXZ-Ph-CHO (1.63 g, 5.00 mmol), ammonium acetate (1.93 g, 25.05 mmol), and acetic acid (50 mL) was refluxed at 120 °C for 4 h under nitrogen. After cooling to room temperature, the system was poured into 200 mL cold water and separated by vacuum suction filtration. and then o-PIOXZ (1.55 g, yield 55%) can be purified by column chromatography with dichloromethane. <sup>1</sup>H NMR (500 MHz, Chloroform-d) δ 8.74 (dd, J = 8.0, 1.4 Hz, 1H), 8.70 (d, J = 8.4 Hz, 1H), 8.66 (d, J = 8.2 Hz, 1H), 8.27 (dd, J = 8.2, 1.4 Hz, 1H), 7.84 (dd, J = 7.7, 1.3 Hz, 1H), 7.73 – 7.67 (m, 1H), 7.62 (ddd, J = 8.5, 7.1, 1.5 Hz, 1H), 7.55 (td, J = 7.6, 1.3 Hz, 1H), 7.50 – 7.36 (m, 7H), 7.35 – 7.30 (m, 2H), 7.26 (d, J = 1.4 Hz, 0H), 7.25 – 7.22 (m, 1H), 7.18 (dd, J = 7.8, 1.2 Hz, 1H), 7.10 (ddd, J = 8.2, 7.0, 1.1 Hz, 1H), 7.04 (d, J = 7.8 Hz, 1H), 6.96 (dddd, J = 10.3, 8.8, 5.1, 1.6 Hz, 2H), 6.87 (dt, J = 9.0, 2.2 Hz, 2H), 6.42 – 6.35 (m, 1H). <sup>13</sup>C NMR (101 MHz, Chloroform-d) δ 163.95, 150.45, 140.67, 139.17, 137.13, 132.64, 132.14, 131.35, 130.92, 130.91, 130.38, 129.42, 129.39, 129.15, 128.89, 128.74, 128.71, 128.53, 128.46, 128.18, 127.97, 127.57, 127.28, 127.20, 126.78, 126.09, 125.55, 124.79, 124.00, 123.45, 123.00, 122.87, 120.69. MALDI-TOF MS (mass m/z): calcd for C<sub>41</sub>H<sub>26</sub>N<sub>4</sub>O, 590.2107; found, 591.2186 [M + H]<sup>+</sup>.

***Synthesis of 2-phenyl-5-(3'-(1-phenyl-1H-phenanthro[9,10-d]imidazol-2-yl)-[1,1'-biphenyl]-3-yl)-1,3,4-oxadiazole (m-PIOXZ):***

A mixture of phenanthrenequinone (1.04 g, 5.01 mmol), aniline (1.87 g, 20.04 mmol), 3-bromobenzaldehyde (0.93 g, 5.01 mmol), ammonium acetate (1.93 g, 25.05 mmol), and acetic acid (50 mL) was refluxed at 120 °C for 4 h under nitrogen. After cooling to room temperature, the system was poured into 200 mL cold water and separated by vacuum suction filtration, and then PPI-3Br (2.09 g, yield 93%) can be purified by column chromatography with petroleum ether/dichloromethane (1/2; v/v). Then, a solution of PPI-3Br (2.00 g, 4.45 mmol), 4,4,4',4'',5,5,5',5''-octamethyl-2,2'-bi(1,3,2-dioxaborolane) (1.36 g, 5.34 mmol), Pd(dppf)<sub>2</sub>Cl<sub>2</sub> (0.10 g, 0.14 mmol), and KOAc (1.31 g, 13.35 mmol) in degassed 1, 4-dioxane (50 mL) was stirred at 90 °C for 12 h under nitrogen. The excess 1, 4-dioxane was removed by a rotary evaporator after cooled down, the mixture was washed with water and dichloromethane, and then PPI-3B (1.66 g, yield 75%) can be purified by column chromatography with petroleum ether/dichloromethane. And then 3-Bromobenzoyl chloride (0.6 mL, 4.55 mmol) was dissolved

in 50 mL dichloromethane. Then the benzoyl hydrazide (0.63 g, 4.63 mmol) was dissolved in 20 mL dichloromethane, and 2 mL triethylamine was added. Then the benzoyl hydrazide solution was slowly added dropwise to the dichloromethane system of 2-Bromobenzoyl chloride, and the reaction was carried out at room temperature for 4 h. After the reaction was completed, the mixture was removed by a rotary evaporator, purified by evaporation crystallization with anhydrous ethanol, and finally filtered and dried to obtain the qOXZ-3Br (1.21 g, yield 83%). And then qOXZ-3Br (1 g, 3.13 mmol) was added to 15 mL of POCl<sub>3</sub> solvent and the resulting solution was refluxed in a closed system in a nitrogen atmosphere at 85 °C for 20 h. After the reaction was completed, the solution was cooled to room temperature, and then the solution was added dropwise to water to quench POCl<sub>3</sub>. The mixed solvent was washed with water and dichloromethane. The organic phase was dried and filtered by MgSO<sub>4</sub>, purified by n-hexane evaporation crystallization, and finally filtered and dried to obtain OXZ-3Br (0.72 g, yield 76%). And then OXZ-3Br (1.00 g, 3.32 mmol), PPI-3B (1.98 g, 3.98 mmol), and K<sub>2</sub>CO<sub>3</sub> (0.69 g, 5.00 mmol) were soluble in THF (50 mL) and water (10 mL), and dropped into Pd(PPh<sub>3</sub>)<sub>4</sub> (0.15 g, 0.13 mmol) at 90 °C for 24 h under N<sub>2</sub>. The excess THF was removed by a rotary evaporator after cooled down, the mixture was washed with water and dichloromethane, and then m-PIOXZ (1.70 g, yield 87%) can be purified by column chromatography with dichloromethane. <sup>1</sup>H NMR (500 MHz, Chloroform-d) δ 8.90 (dd, J = 8.0, 1.3 Hz, 1H), 8.76 (d, J = 8.4 Hz, 1H), 8.70 (d, J = 8.3 Hz, 1H), 8.22 – 8.13 (m, 3H), 8.09 (dt, J = 6.5, 2.0 Hz, 1H), 7.78 – 7.72 (m, 1H), 7.70 – 7.63 (m, 5H), 7.62 – 7.48 (m, 9H), 7.42 (t, J = 7.8 Hz, 1H), 7.31 – 7.25 (m, 1H), 7.23 (dd, J = 8.4, 1.6 Hz, 1H). <sup>13</sup>C NMR (101 MHz, Chloroform-d) δ 164.74, 150.46, 141.67, 139.81, 138.80, 131.83, 131.25, 130.47, 130.37, 130.10, 129.54, 129.36, 129.20, 129.14, 128.98, 128.34, 128.23, 127.59, 127.34, 127.23, 127.02, 126.35, 125.92, 125.70, 125.49, 125.01, 124.49, 124.15, 123.93, 123.17, 123.04, 122.78, 120.94. MALDI-TOF MS (mass m/z): calcd for C<sub>41</sub>H<sub>26</sub>N<sub>4</sub>O, 590.2107; found, 591.2176 [M + H]<sup>+</sup>.

***Synthesis of 2-(3'-(9H-carbazol-9-yl)-[1,1'-biphenyl]-3-yl)-5-phenyl-1,3,4-oxadiazole (m-CZOXZ):***

A mixture of OXZ-3Br (1 g, 3.32 mmol), (3-(9H-carbazol-9-yl) phenyl) boronic acid (1.14 g, 3.98 mmol), and K<sub>2</sub>CO<sub>3</sub> (0.69 g, 5.00 mmol) were soluble in THF (50 mL) and water (10 mL), and dropped into Pd(PPh<sub>3</sub>)<sub>4</sub> (0.15 g, 0.13 mmol) at 90 °C for 24 h under N<sub>2</sub>. The excess THF was removed by a rotary evaporator after cooled down, the mixture was washed with water and dichloromethane, and then m-CZOXZ (1.28 g, yield 83%) can be purified by column chromatography with dichloromethane. <sup>1</sup>H NMR (500 MHz, Chloroform-d) δ 8.16 (ddd, J =

8.1, 6.7, 1.8 Hz, 5H), 7.87 (t, J = 1.9 Hz, 1H), 7.84 – 7.69 (m, 3H), 7.62 (t, J = 7.7 Hz, 2H), 7.57 – 7.40 (m, 7H), 7.35 – 7.28 (m, 2H). <sup>13</sup>C NMR (101 MHz, Chloroform-d) δ 141.89, 141.22, 140.86, 138.50, 131.84, 130.59, 130.44, 129.84, 129.12, 127.04, 126.60, 126.28, 126.09, 125.81, 125.56, 124.73, 123.86, 123.50, 120.44, 120.14, 109.77. MALDI-TOF MS (mass m/z): calcd for C<sub>32</sub>H<sub>21</sub>N<sub>3</sub>O, 463.1685; found, 464.1763 [M + H]<sup>+</sup>.

### SI-3 Supporting Figures

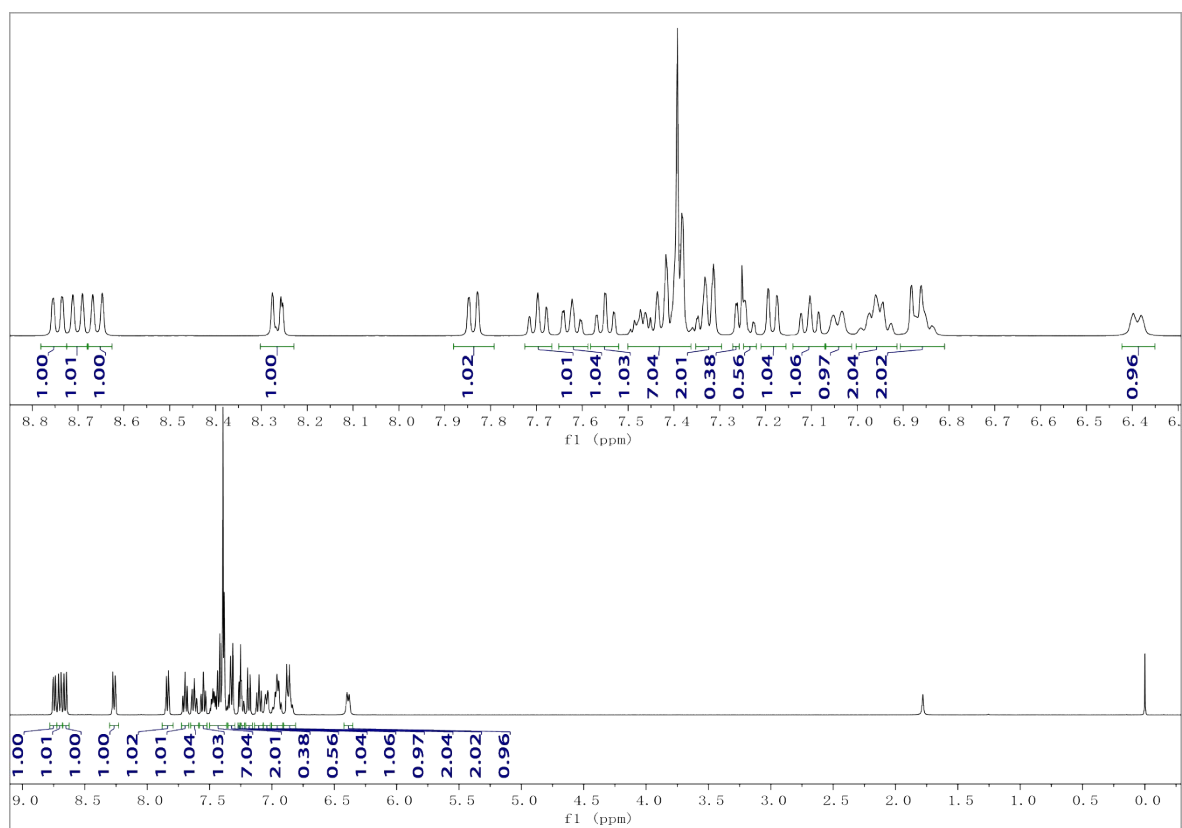

**Fig S1.**  $^1\text{H}$  NMR spectrums of *o*-PIOXZ in  $\text{CDCl}_3$ .

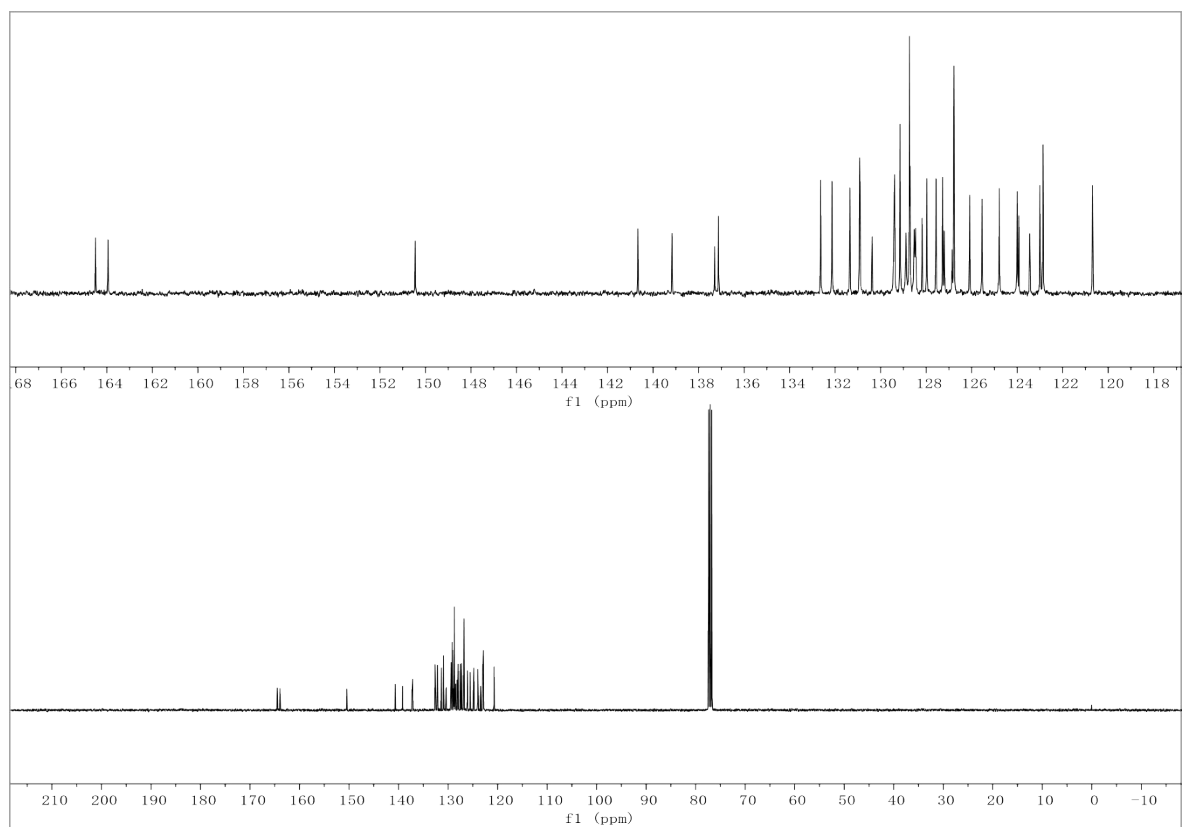

**Fig S2.**  $^{13}\text{C}$  NMR spectrums of *o*-PIOXZ in  $\text{CDCl}_3$ .



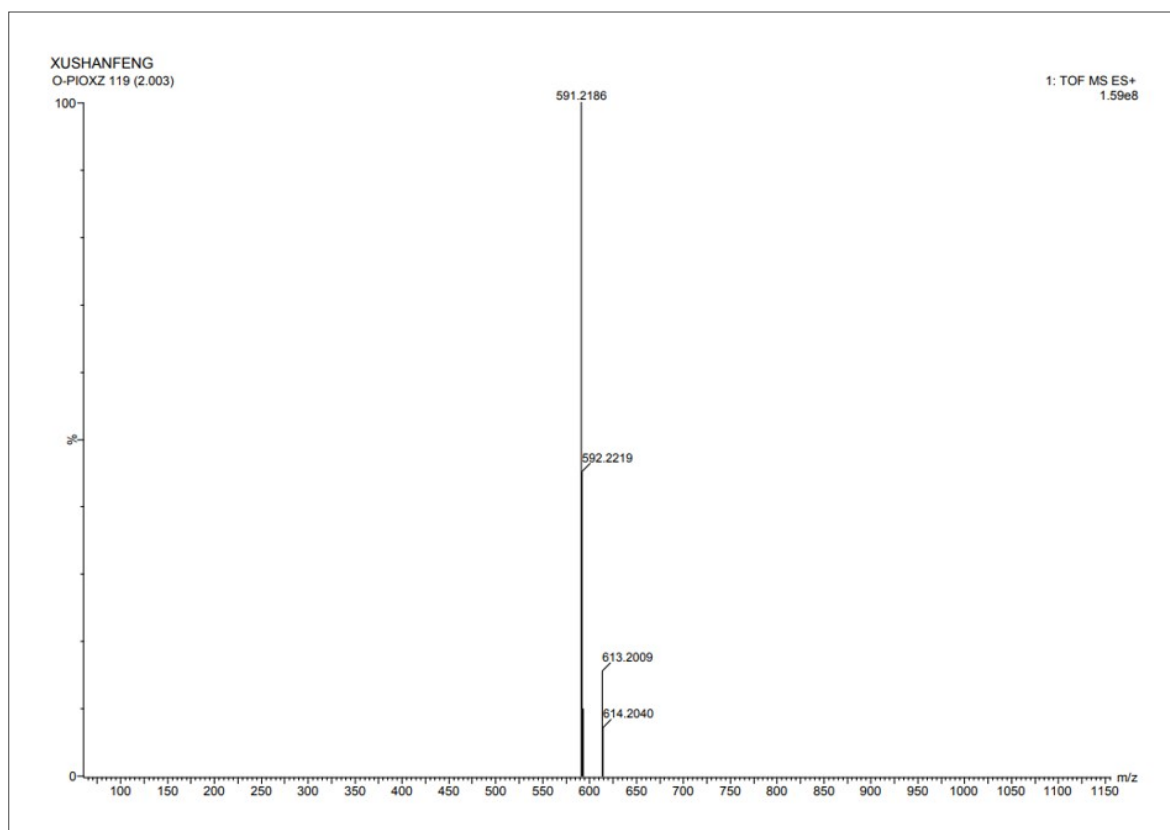

**Fig S3.** Mass Spectrum  $[M + H]^+$  of o-PIXOZ.

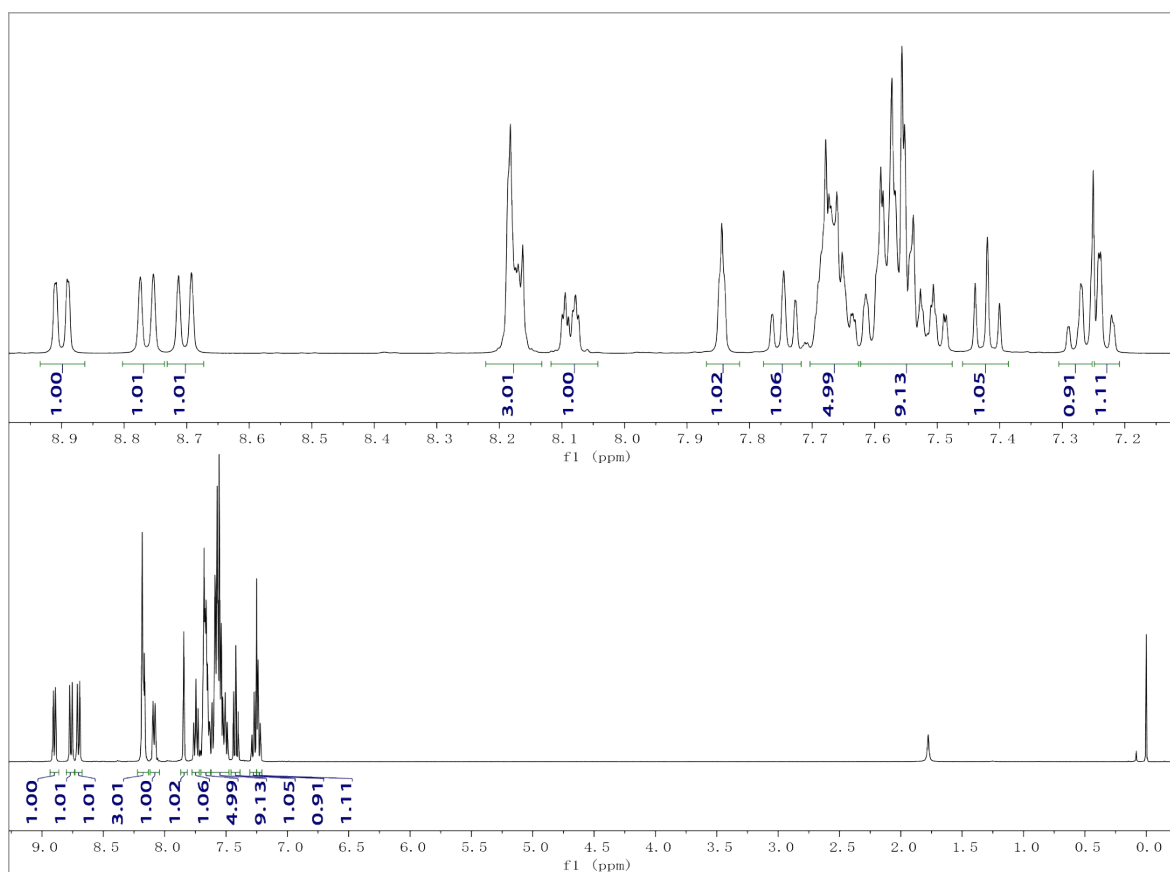

**Fig S4.**  $^1\text{H}$  NMR spectrums of m-PIXOZ in  $\text{CDCl}_3$ .

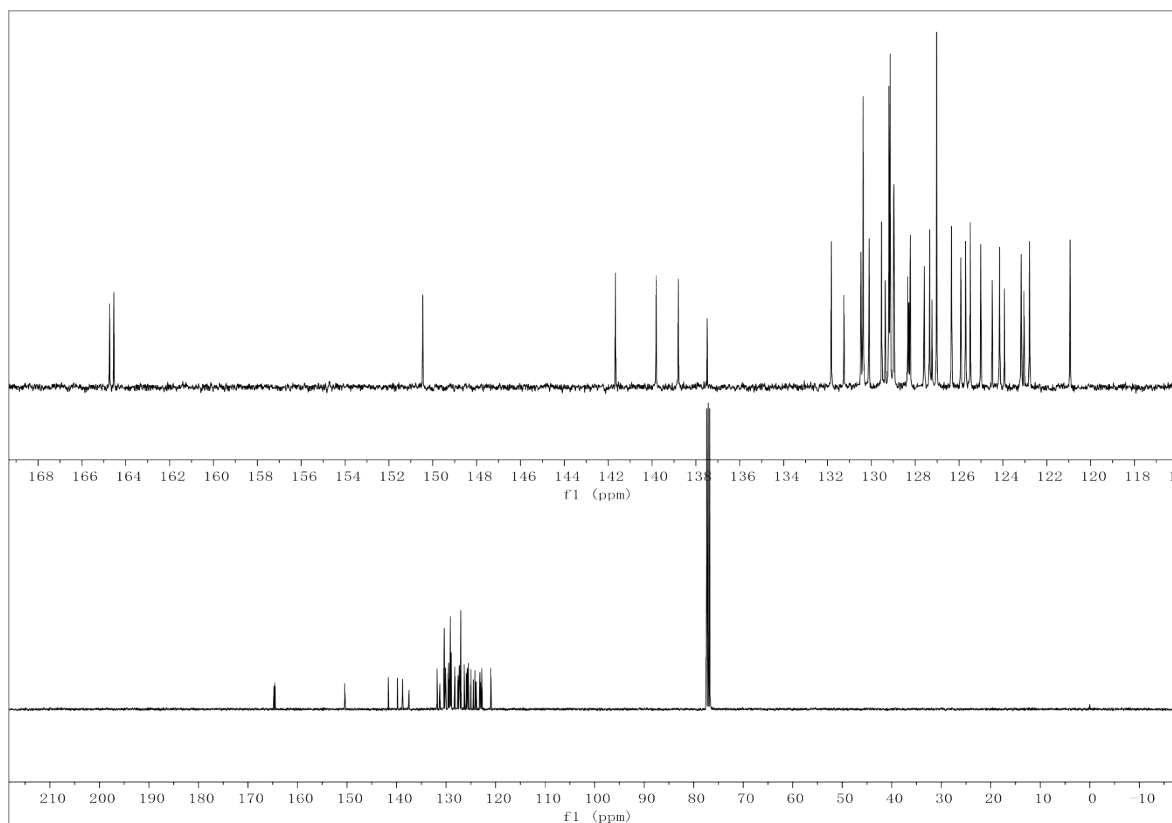

**Fig S5.**  $^{13}\text{C}$  NMR spectra of m-PIOXZ in  $\text{CDCl}_3$ .

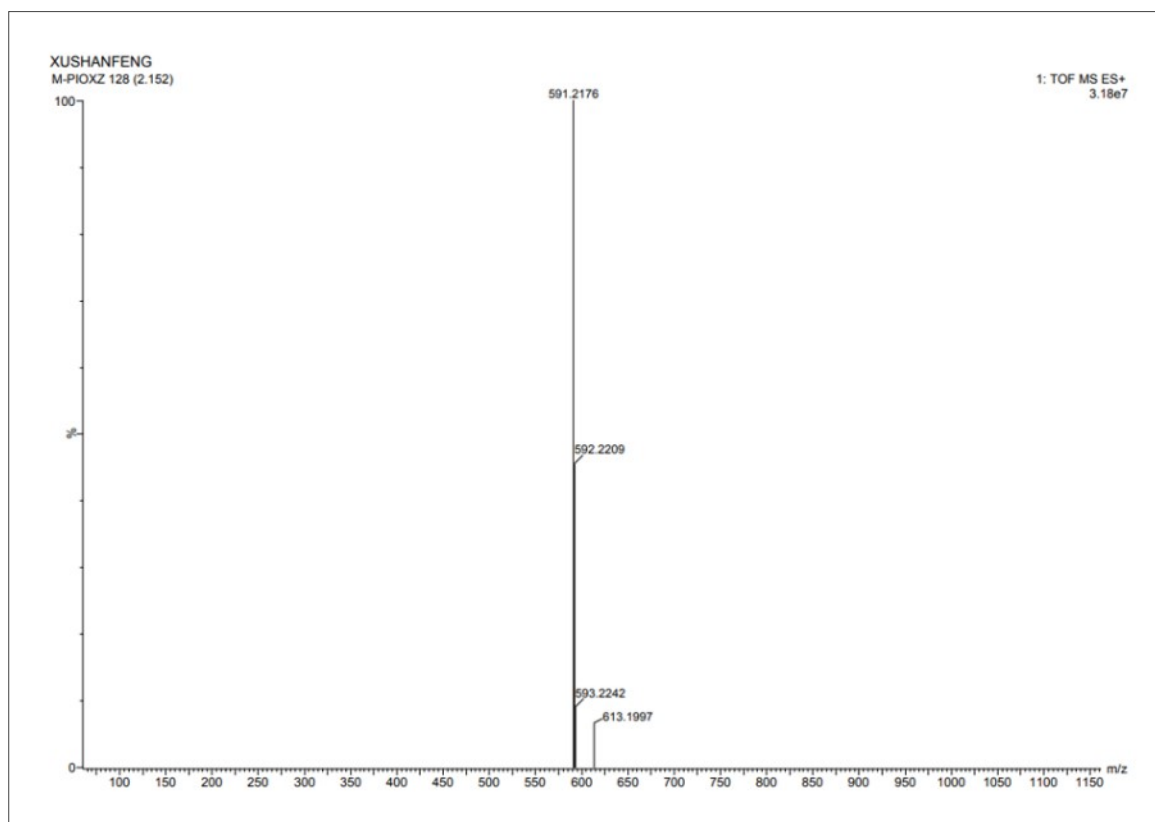

**Fig S6.** Mass Spectrum  $[\text{M} + \text{H}]^+$  of m-PIXOZ.

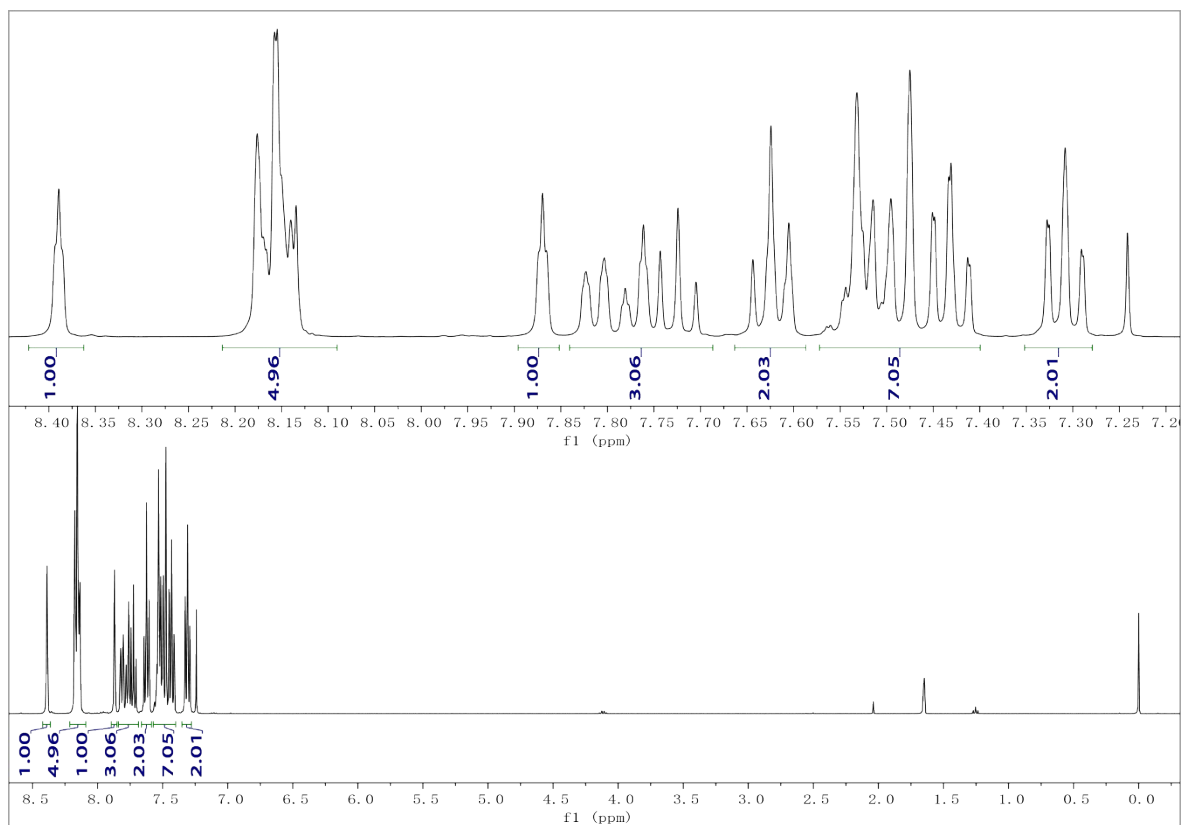

**Fig S7.**  $^1\text{H}$  NMR spectra of *m*-CZOXZ in  $\text{CDCl}_3$ .

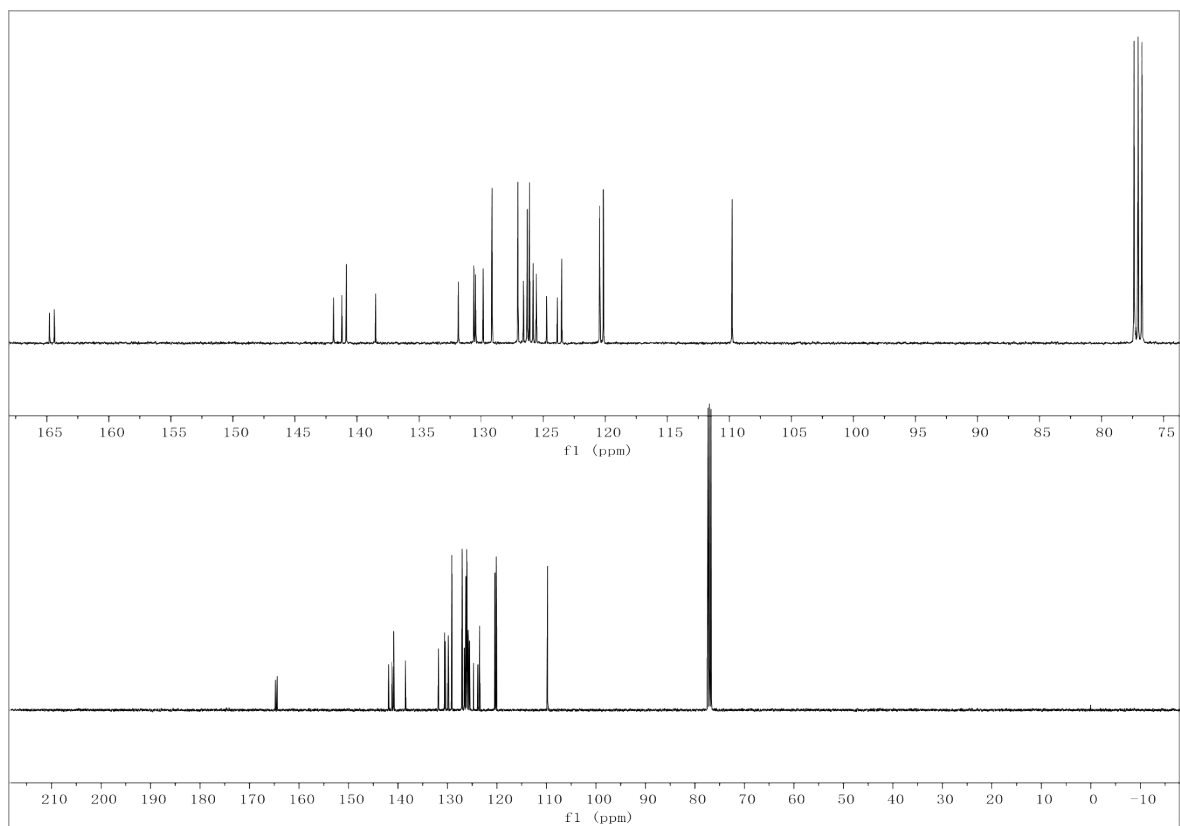

**Fig S8.**  $^{13}\text{C}$  NMR spectra of *m*-CZOXZ in  $\text{CDCl}_3$ .

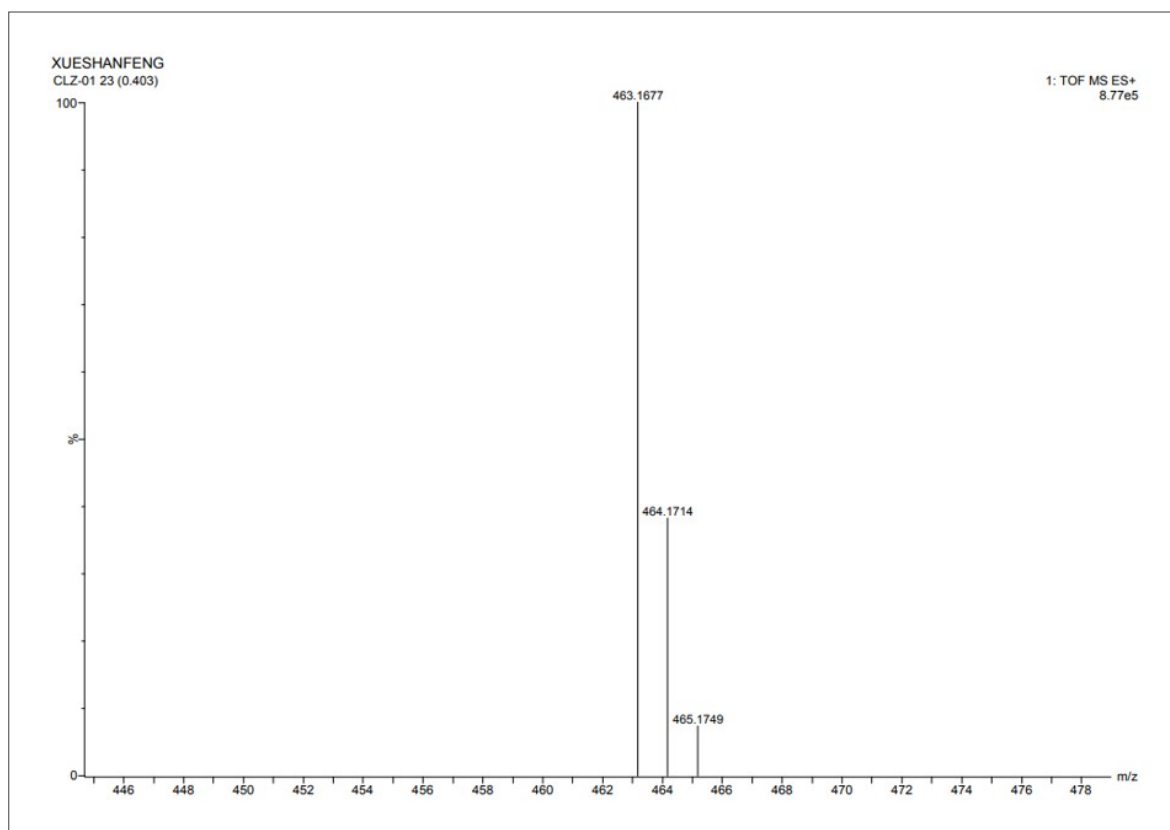

**Fig S9.** Mass Spectrum  $[M + H]^+$  of m- CZOXZ.

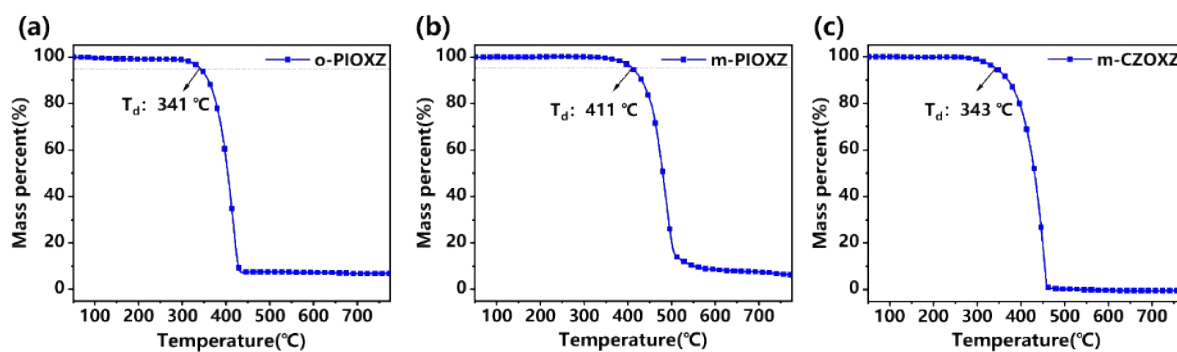

**Fig S10.** The TGA graphs of a) o-PIOXZ, b) m-PIOXZ, and c) m-CZOXZ.

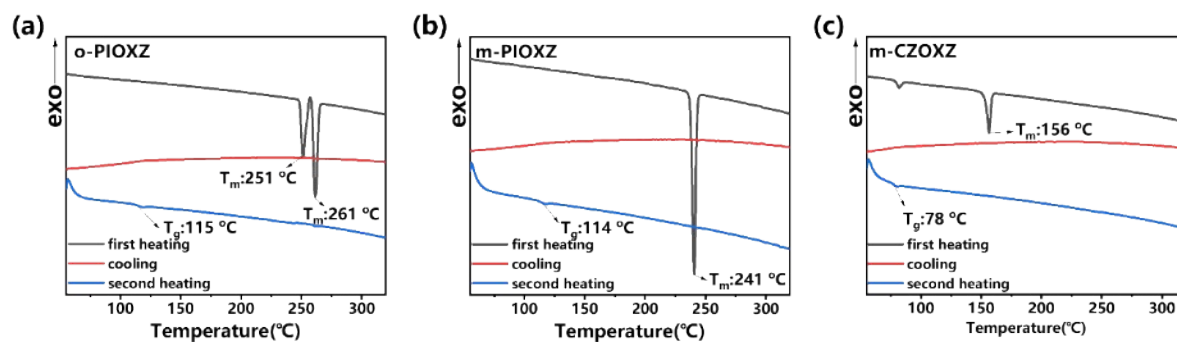

**Fig S11.** The DSC graphs of a) o-PIOXZ, b) m-PIOXZ, and c) m-CZOXZ.

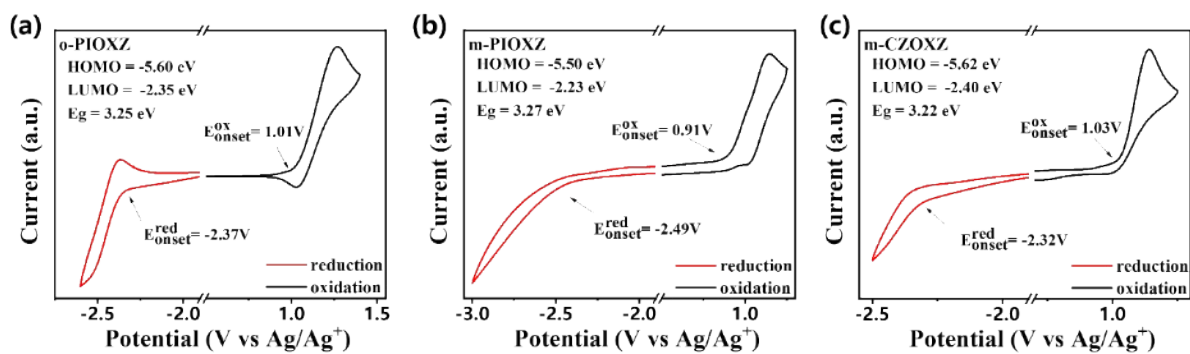

**Fig S12.** The cyclic voltammetry curve of the a) o-PIOXZ, b) m-PIOXZ, and c) m-CZOXZ in dichloromethane solution (oxidation section) and DMF solution (reduction section).

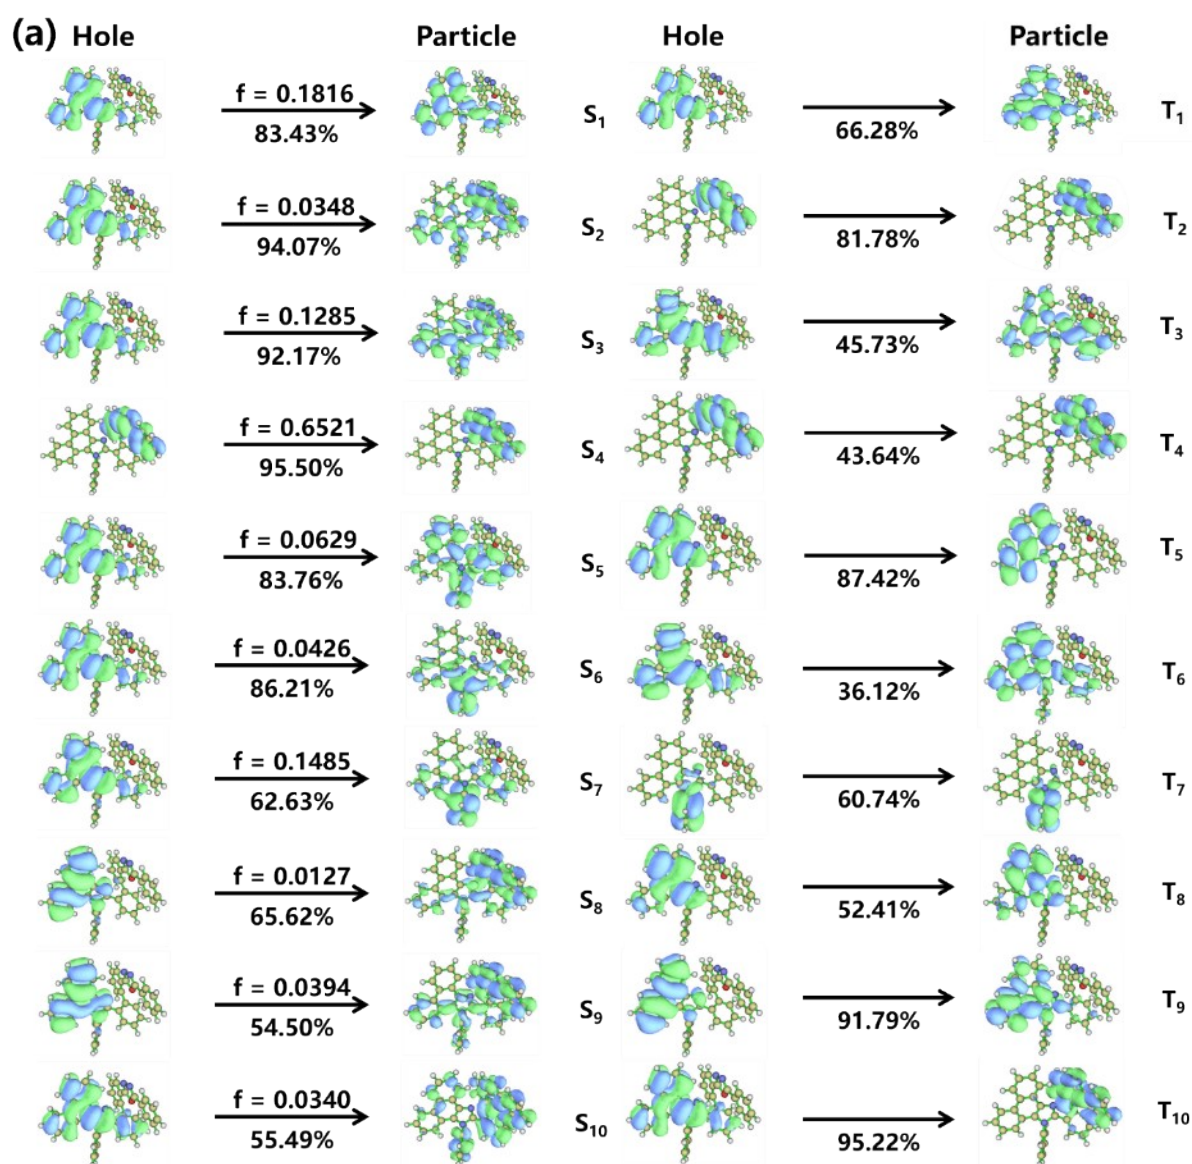

**Fig S13.** NTOs describing the transition characters of the S<sub>1</sub>-S<sub>10</sub> and T<sub>1</sub>-T<sub>10</sub> states in o-PIOXZ.

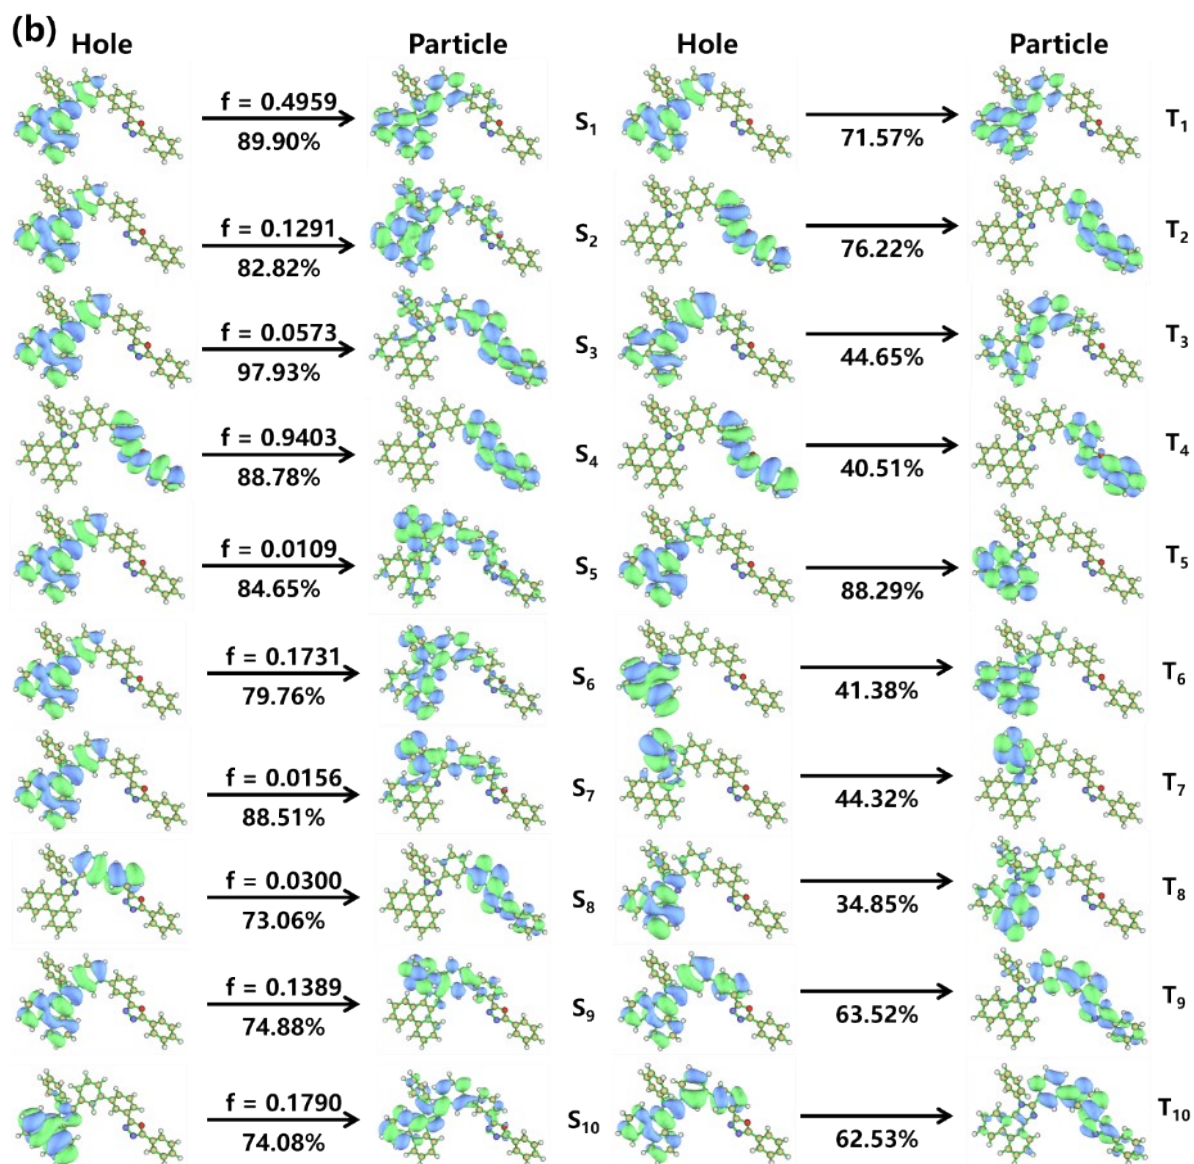

**Fig S14.** NTOs describing the transition characters of the S<sub>1</sub>-S<sub>10</sub> and T<sub>1</sub>-T<sub>10</sub> states in m-PIOXZ.



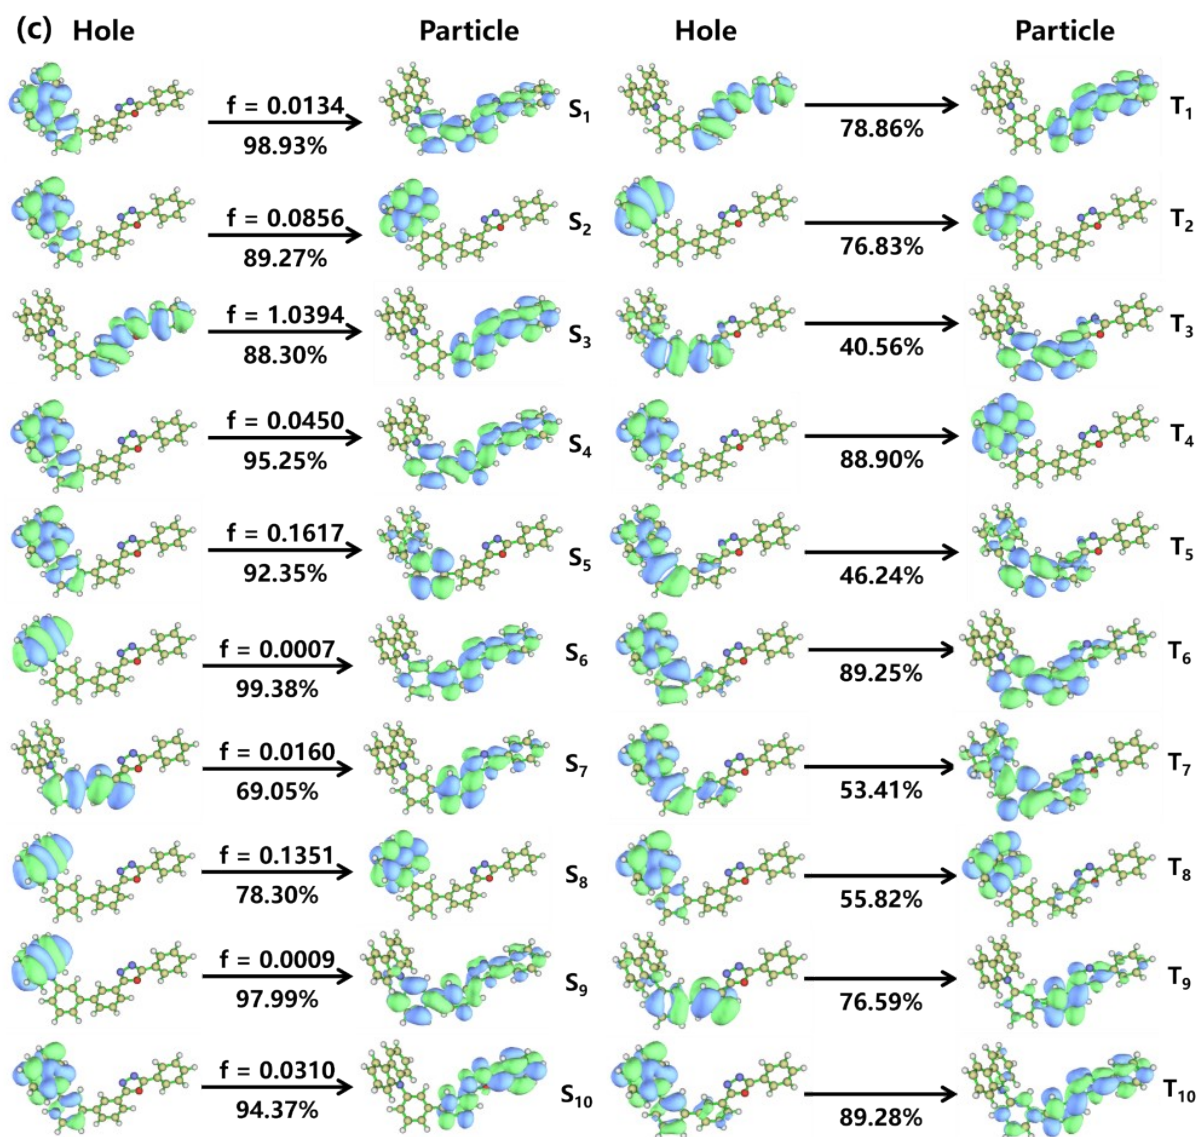

**Fig S15.** NTOs describing the transition characters of the  $S_1$ - $S_{10}$  and  $T_1$ - $T_{10}$  states in m-CZOXX.

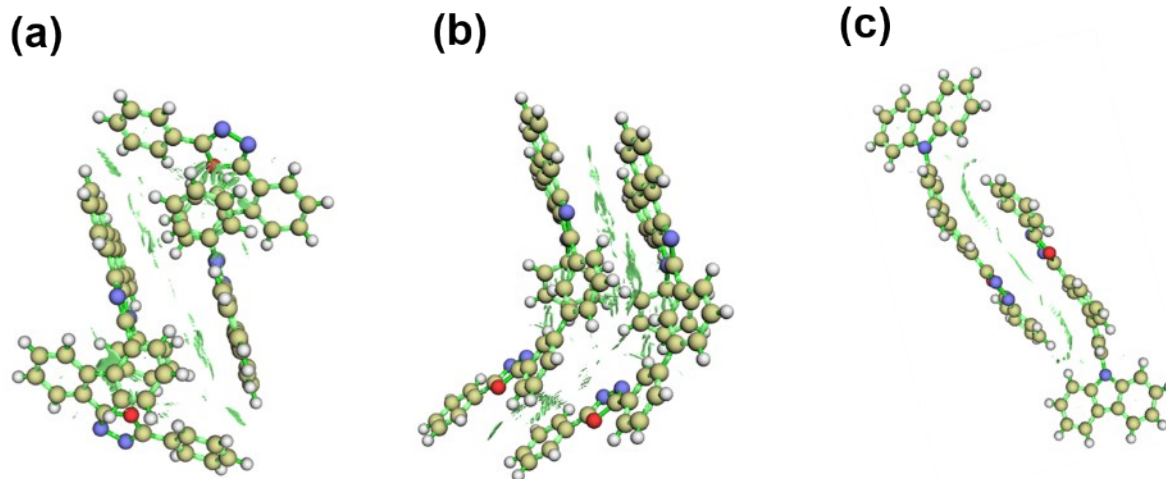

**Fig S16.** Intramolecular interactions for a) o-PIOXZ, b) m-PIOXZ, and c) m-CZOXZ molecule.

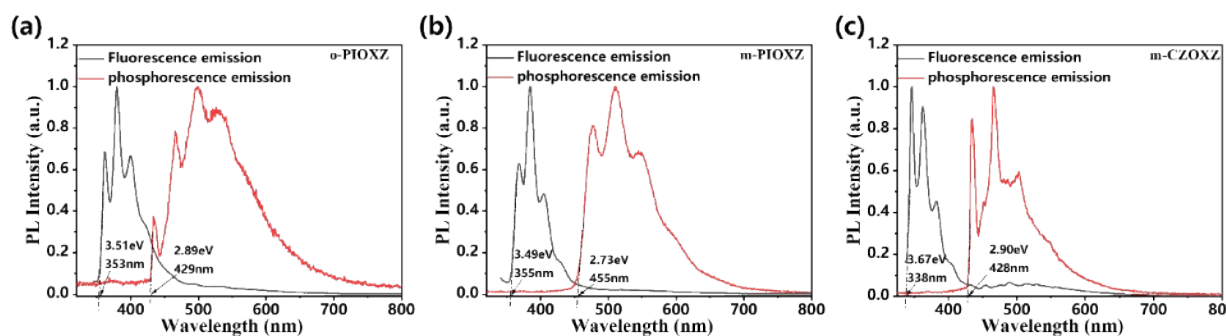

**Fig S17.** Normalized fluorescence and phosphorescence spectra of a) o-PIOXZ, b) m-PIOXZ, and c) m-CZOXZ in toluene solution ( $10^{-5}$  M) at 77 K.

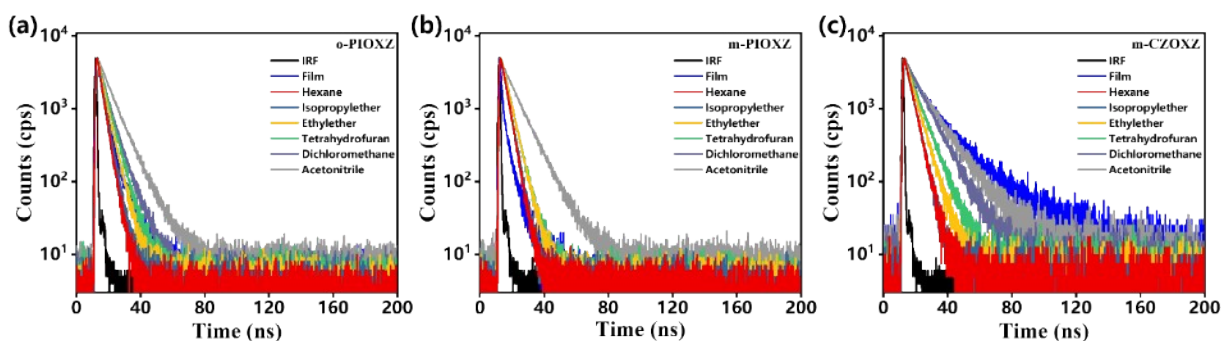

**Fig S18.** Transient PL spectra of a) o-PIOXZ, b) m-PIOXZ, and c) m-CZOXZ.



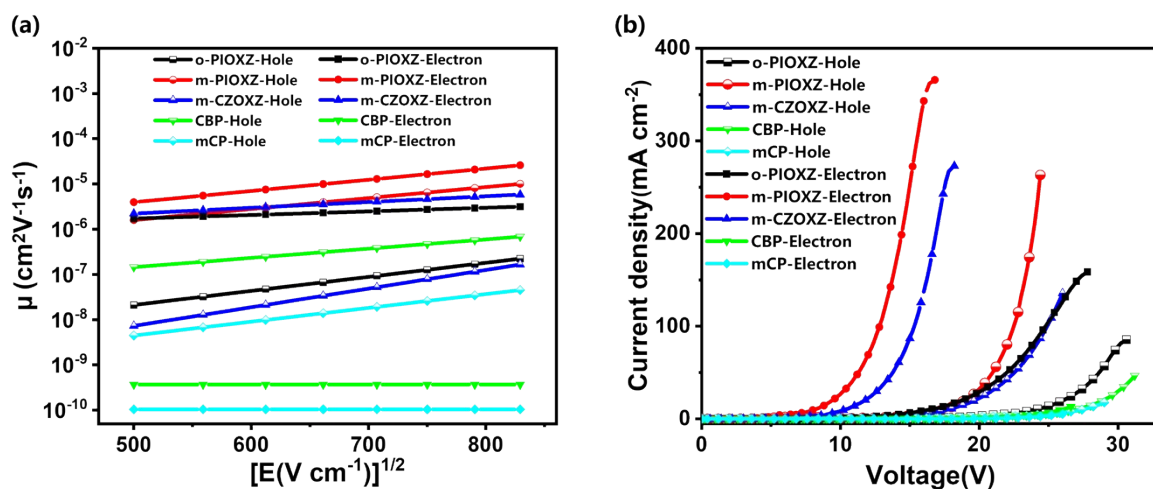

**Fig 19.** a) Electron field intensity-mobility curves and b) current density–voltage curves of m-PIOXZ, o-PIOXZ, m-CZOXZ, CBP, and mCP.

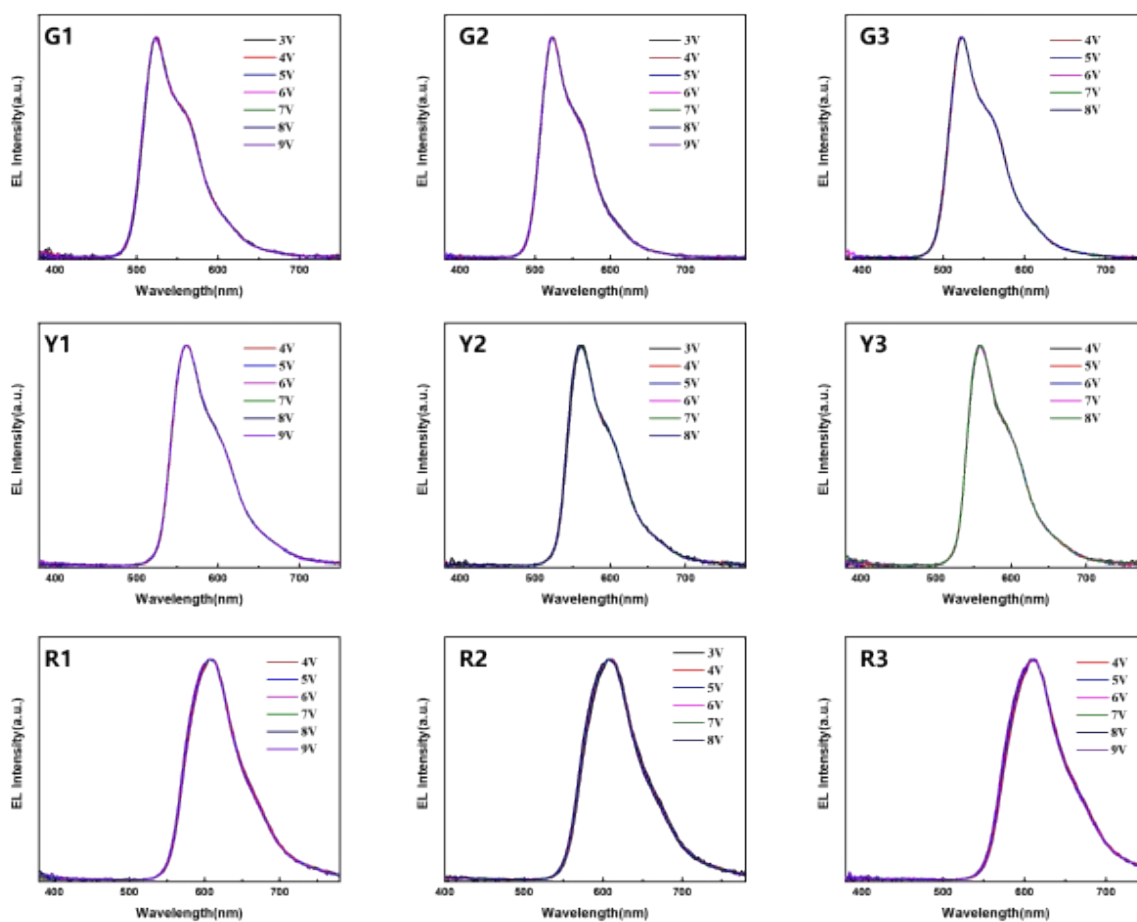

**Fig S20.** Normalized EL spectra at different voltages.

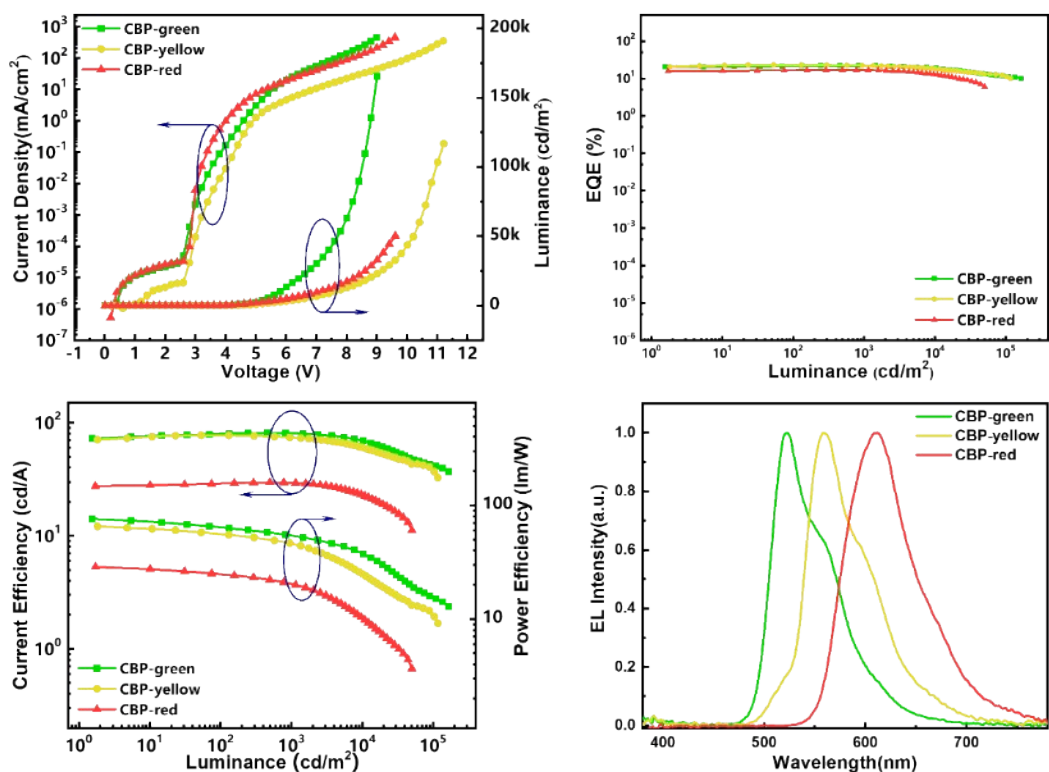

**Fig S21.** a) Current density-voltage-luminance curves; b) EQE-luminance curves; c) Current efficiency-luminance-power efficiency curves; d) The EL spectrum at EQE<sub>max</sub>. Green, Red, Yellow are manufactured with CBP as the host.

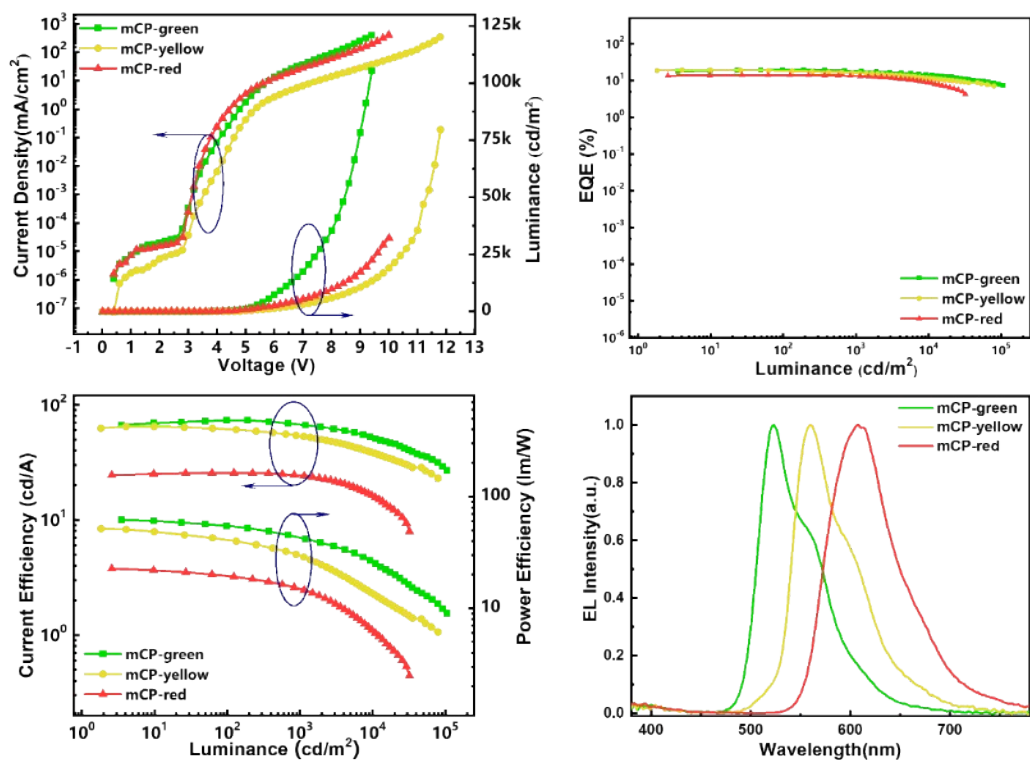

**Fig S22.** a) Current density-voltage-luminance curves; b) EQE-luminance curves; c) Current efficiency-luminance-power efficiency curves; d) The EL spectrum at EQE<sub>max</sub>. Green, Red, Yellow are manufactured with mCP as the host.

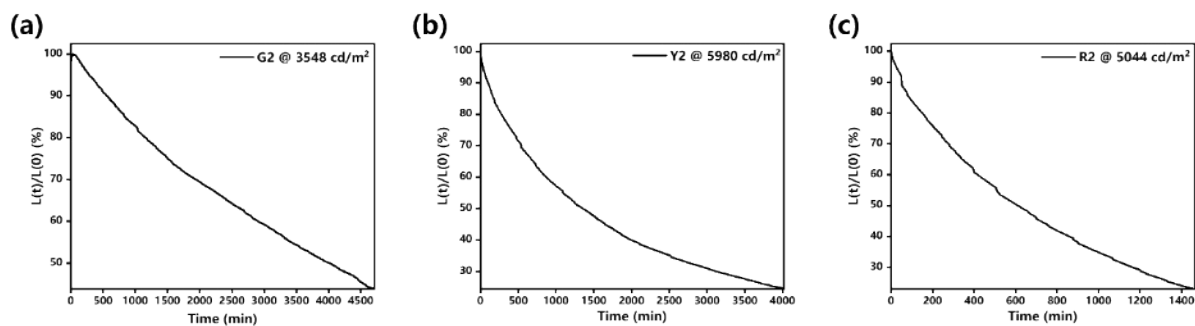

**Fig S23.** Luminance decay curves of device G2 at 3548 cd/m<sup>2</sup>, device Y2 at 5980 cd/m<sup>2</sup>, and device R2 at 5044 cd/m<sup>2</sup>.

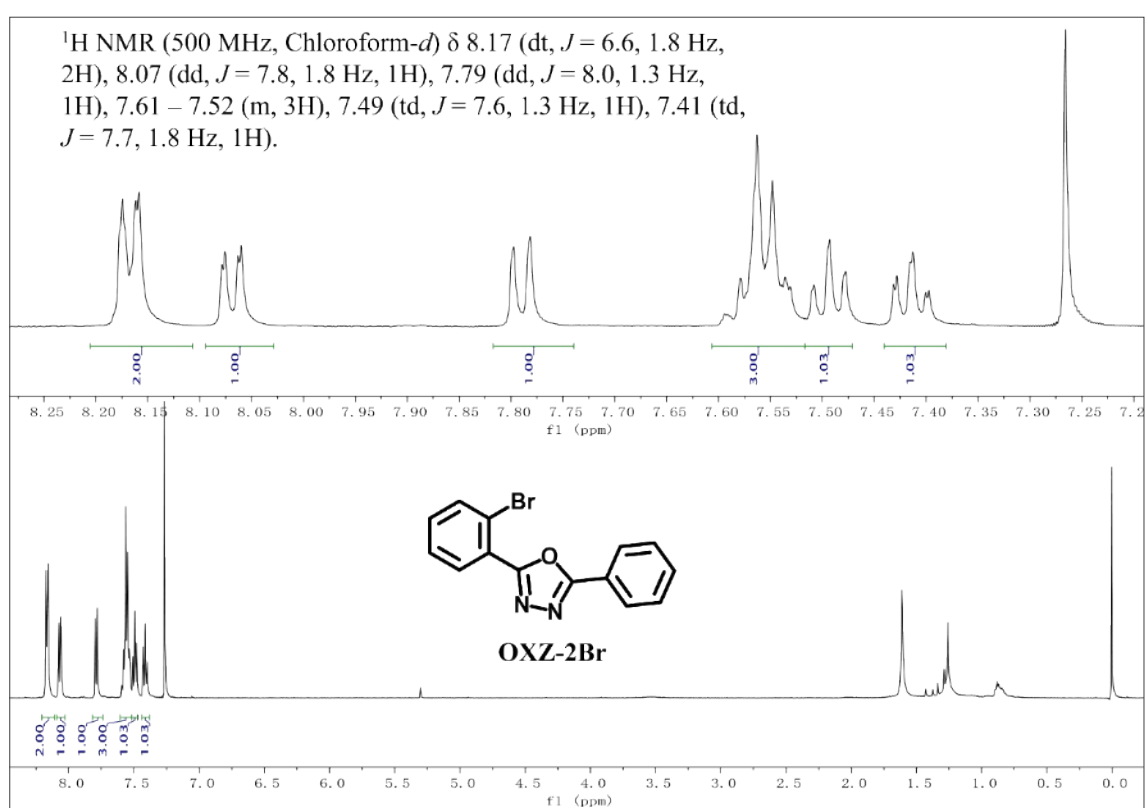

**Fig S24.** <sup>1</sup>H NMR spectra of OXZ-2Br in CDCl<sub>3</sub>.

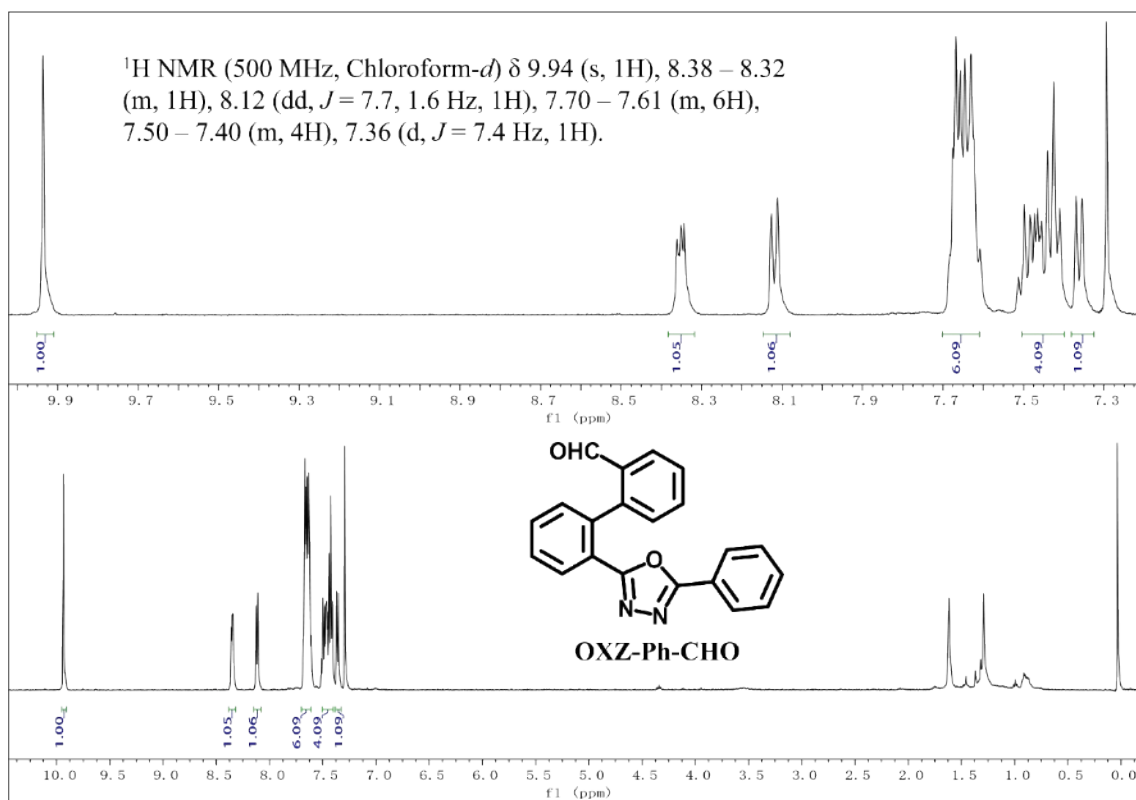

**Fig S25.** <sup>1</sup>H NMR spectrums of OXZ-Ph-CHO in CDCl<sub>3</sub>.

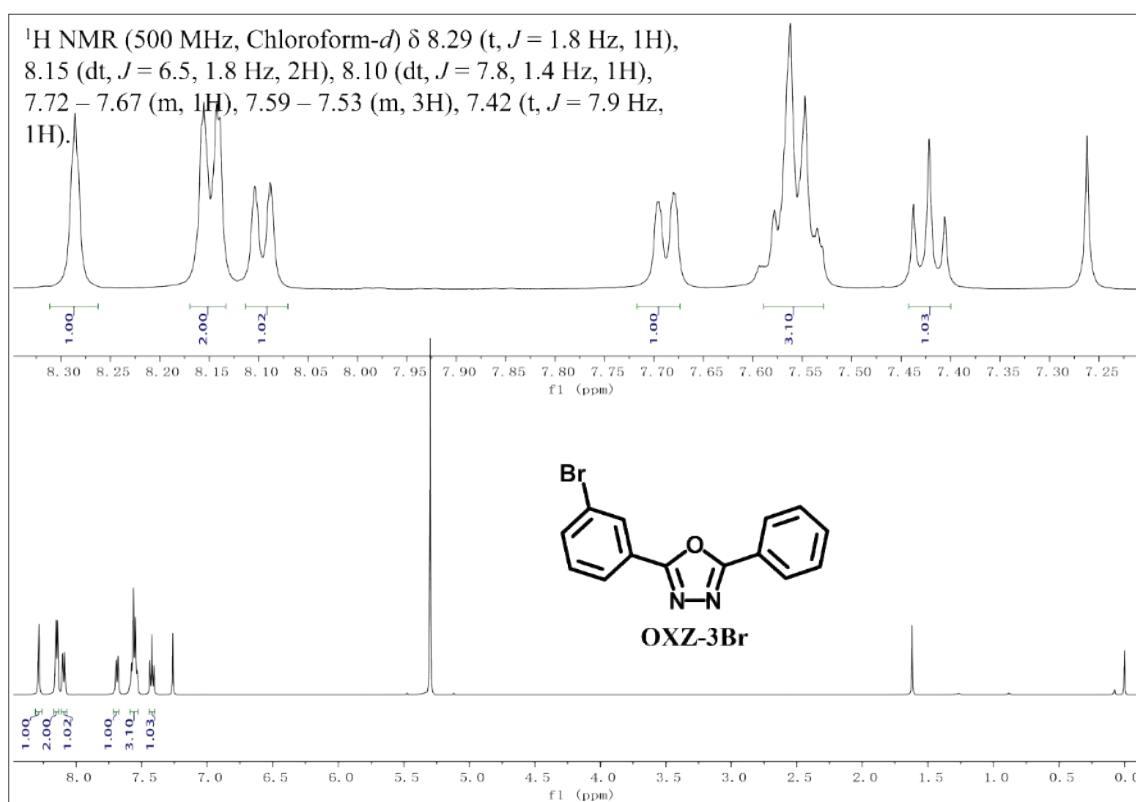

**Fig S26.** <sup>1</sup>H NMR spectrums of OXZ-3Br in CDCl<sub>3</sub>.

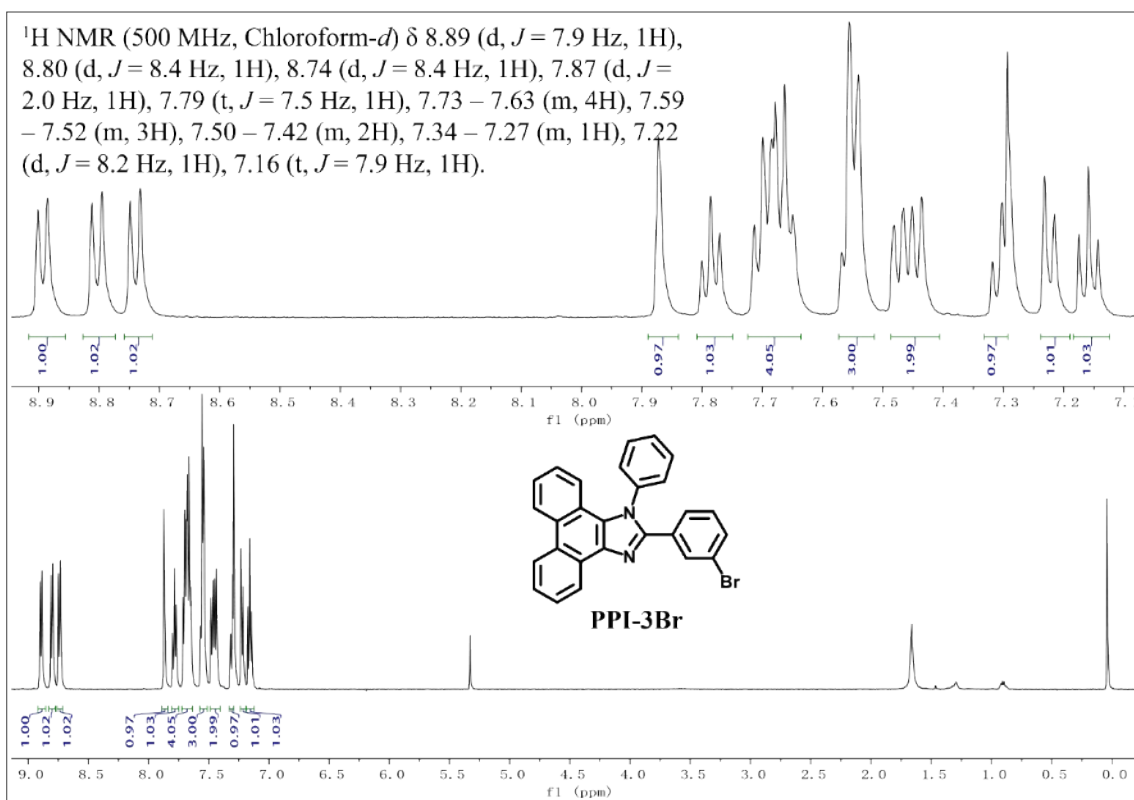

**Fig S27.** <sup>1</sup>H NMR spectrums of PPI-3Br in CDCl<sub>3</sub>.

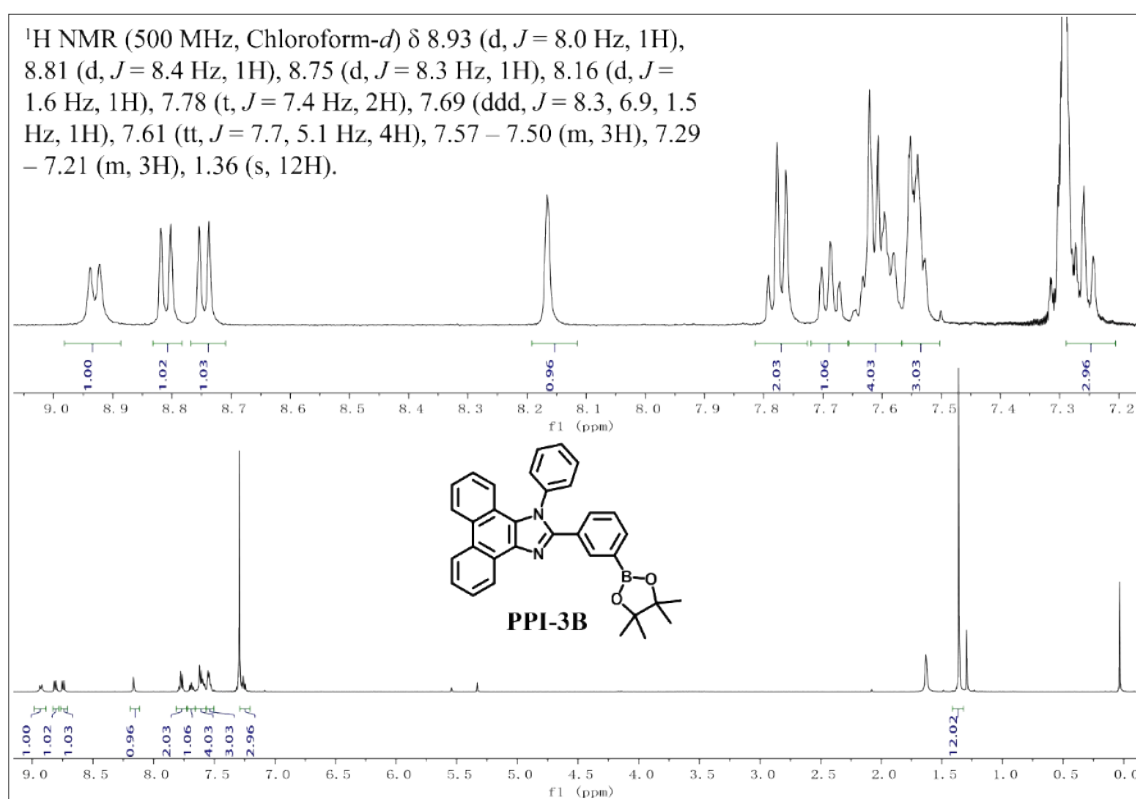

**Fig S28.** <sup>1</sup>H NMR spectrums of PPI-3B in CDCl<sub>3</sub>.

## SI-4 Supporting Tables

**Table S1.** The lifetime of G2, Y2, and R2 doped devices.

| Devices                        | LT <sub>50</sub> [h] | LT <sub>50</sub> (@ 1000 cd/m <sup>2</sup> ) [h] |
|--------------------------------|----------------------|--------------------------------------------------|
| G2 (@ 3548 cd/m <sup>2</sup> ) | 67.75                | 583                                              |
| Y2 (@ 5980 cd/m <sup>2</sup> ) | 20.92                | 437                                              |
| R2 (@ 5044 cd/m <sup>2</sup> ) | 9.95                 | 156                                              |

**Table S2.** EL performance of PhOLEDs based on CBP and mCP hosts.

| Devices <sup>a)</sup> | V <sub>on</sub> [V] | L <sub>max</sub><br>[cd/m <sup>2</sup> ] | CE <sub>max</sub><br>[cd/A <sup>-1</sup> ] | PE <sub>max</sub><br>[lm/W] | EQE <sub>max</sub><br>[%] | EQE <sub>roll-off</sub><br>[%] | λ <sub>EL</sub><br>[nm] | CIE<br>(x,y) |
|-----------------------|---------------------|------------------------------------------|--------------------------------------------|-----------------------------|---------------------------|--------------------------------|-------------------------|--------------|
| G-C                   | 3.0                 | 165459                                   | 81.22                                      | 75.94                       | 21.99                     | 0.70                           | 522                     | (0.31,0.63)  |
| G-m                   | 3.4                 | 105288                                   | 73.30                                      | 61.76                       | 19.72                     | 7.79                           | 523                     | (0.31,0.63)  |
| Y-C                   | 3.4                 | 116865                                   | 77.26                                      | 65.25                       | 23.13                     | 4.35                           | 559                     | (0.47,0.51)  |
| Y-m                   | 3.8                 | 79645                                    | 64.86                                      | 51.64                       | 19.44                     | 16.91                          | 560                     | (0.47,0.51)  |
| R-C                   | 3.0                 | 50345                                    | 29.58                                      | 28.69                       | 16.74                     | 0.86                           | 612                     | (0.61,0.38)  |
| R-m                   | 3.4                 | 32173                                    | 25.64                                      | 22.64                       | 14.00                     | 5.27                           | 607                     | (0.60,0.39)  |

<sup>a)</sup> CBP and mCP are the host materials for G-C and G-m, R-C and R-m, and Y-C and Y-m devices, respectively.

**Table S3.** Crystal data for o-PIOXZ and m-PIOXZ.

| Compound                                                                      | o-PIOXZ                                          | m-PIOXZ                                          | m-CZOXZ                                          |
|-------------------------------------------------------------------------------|--------------------------------------------------|--------------------------------------------------|--------------------------------------------------|
| Chemical formula                                                              | C <sub>41</sub> H <sub>26</sub> N <sub>4</sub> O | C <sub>41</sub> H <sub>26</sub> N <sub>4</sub> O | C <sub>32</sub> H <sub>21</sub> N <sub>3</sub> O |
| Formula weight                                                                | 590.66                                           | 590.66                                           | 463.52                                           |
| Crystal system                                                                | Triclinic                                        | Triclinic                                        | monoclinic                                       |
| <i>a</i> /Å                                                                   | 10.3270(13)                                      | 5.5050(1)                                        | 53.653(3)                                        |
| <i>b</i> /Å                                                                   | 11.0712(14)                                      | 19.8183(3)                                       | 9.1100(6)                                        |
| <i>c</i> /Å                                                                   | 13.0992(17)                                      | 27.3727(4)                                       | 11.0235(7)                                       |
| <i>α</i> °                                                                    | 93.047(2)                                        | 90                                               | 90                                               |
| <i>β</i> °                                                                    | 92.234(2)                                        | 95.443(1)                                        | 95.524(3)                                        |
| <i>γ</i> °                                                                    | 102.161(2)                                       | 90                                               | 90                                               |
| Unit cell volume/ Å <sup>3</sup>                                              | 1460.1(3)                                        | 2972.89(8)                                       | 5363.0(6)                                        |
| Temperature/K                                                                 | 100                                              | 298                                              | 303                                              |
| Space group                                                                   | P -1                                             | P 21/n                                           | C 2/c                                            |
| Z                                                                             | 2                                                | 4                                                | 8                                                |
| Density (calculated) /g cm <sup>-3</sup>                                      | 1.344                                            | 1.320                                            | 1.148                                            |
| F(000)                                                                        | 616.0                                            | 1232.0                                           | 1936.0                                           |
|                                                                               | -12 ≤ <i>h</i> ≤ 12                              | -6 ≤ <i>h</i> ≤ 6                                | -63 ≤ <i>h</i> ≤ 63                              |
| Index ranges                                                                  | -13 ≤ <i>k</i> ≤ 10                              | -23 ≤ <i>k</i> ≤ 23                              | -10 ≤ <i>k</i> ≤ 10                              |
|                                                                               | -15 ≤ <i>l</i> ≤ 15                              | -32 ≤ <i>l</i> ≤ 32                              | -13 ≤ <i>l</i> ≤ 13                              |
| Reflections measured                                                          | 5147                                             | 5503                                             | 4736                                             |
| Completeness to theta = 72.13°                                                | 99.1%                                            | 99.4%                                            | 99.6%                                            |
| Min. and max. transmission                                                    | 0.6514 and 0.7456                                | 0.4868 and 0.7531                                | 0.4868 and 0.7531                                |
| Data / restraints / parameters                                                | 5101/0/416                                       | 5471/0/415                                       | 4718/0/325                                       |
| Goodness-of-fit on <i>F</i> <sup>2</sup>                                      | 0.955                                            | 1.047                                            | 1.047                                            |
| Final <i>R</i> <sub>1</sub> values ( <i>I</i> > 2σ( <i>I</i> ))               | 0.0355                                           | 0.1050                                           | 0.0759                                           |
| Final <i>wR</i> ( <i>F</i> <sup>2</sup> ) values ( <i>I</i> > 2σ( <i>I</i> )) | 0.0960                                           | 0.0390                                           | 0.1942                                           |
| Final <i>R</i> <sub>1</sub> values (all data)                                 | 0.0471                                           | 0.1050                                           | 0.0921                                           |
| Final <i>wR</i> ( <i>F</i> <sup>2</sup> ) values (all data)                   | 0.0981                                           | 0.0480                                           | 1.047                                            |
| CCDC number                                                                   | 2410469                                          | 2410470                                          | 2413461                                          |
